# Supplementary material for: ChIPulate: A comprehensive ChIP-seq simulation pipeline
Source: PubMed Central journal article supplement (PMC6445533; doi:10.1371/journal.pcbi.1006921), 2019-03-21
Supplement: pcbi.1006921.s007.pdf [file pcbi.1006921.s007.pdf]

| Domain | TF     | Binding Energy Matrix |            |            |            |            |            |            |            |            |            |            |
|--------|--------|-----------------------|------------|------------|------------|------------|------------|------------|------------|------------|------------|------------|
| AP2    | CBF1   | A                     | 0.42       | 0.38       | 1.87       | 5.7        | <b>0.0</b> | 6.62       | 2.31       | 2.93       | 4.59       | 0.3        |
|        |        | C                     | 0.71       | 1.79       | 2.1        | <b>0.0</b> | 3.95       | <b>0.0</b> | 3.54       | 3.06       | 4.66       | <b>0.0</b> |
|        |        | G                     | <b>0.0</b> | <b>0.0</b> | 1.81       | 4.84       | 5.75       | 3.39       | <b>0.0</b> | 2.94       | <b>0.0</b> | 0.36       |
|        |        | T                     | 0.87       | 2.0        | <b>0.0</b> | 6.6        | 4.77       | 3.13       | 6.75       | <b>0.0</b> | 2.76       | 0.14       |
| ARID   | ARID3A | A                     | 0.25       | 0.98       | 1.49       | 2.05       | <b>0.0</b> | <b>0.0</b> | 7.08       | 0.35       | 0.1        | 0.12       |
|        |        | C                     | 0.72       | 1.02       | 1.69       | 1.86       | 1.7        | 2.99       | 7.81       | 0.46       | <b>0.0</b> | 0.3        |
|        |        | G                     | 0.54       | 1.59       | 1.94       | 2.88       | 0.16       | 3.9        | 8.14       | 1.24       | 0.26       | <b>0.0</b> |
|        |        | T                     | <b>0.0</b> | <b>0.0</b> | <b>0.0</b> | <b>0.0</b> | 0.46       | 3.11       | <b>0.0</b> | <b>0.0</b> | 0.21       | 0.41       |
| C6     | RDS2   | A                     | 0.33       | 0.04       | 1.19       | 2.6        | 5.27       | 3.5        | 0.05       | <b>0.0</b> | <b>0.0</b> | 0.11       |
|        |        | C                     | <b>0.0</b> | <b>0.0</b> | 1.8        | <b>0.0</b> | 2.46       | 2.5        | 1.67       | 0.32       | 0.38       | 0.32       |
|        |        | G                     | 0.13       | 0.26       | 1.34       | 3.85       | <b>0.0</b> | <b>0.0</b> | <b>0.0</b> | 0.2        | 0.42       | 0.46       |
|        |        | T                     | <b>0.0</b> | 0.1        | <b>0.0</b> | 5.23       | 6.62       | 3.12       | 1.63       | 0.4        | 0.03       | <b>0.0</b> |
| CC     | RARA   | A                     | 0.29       | 0.38       | 3.04       | 2.06       | <b>0.0</b> | 1.57       | 2.26       | 2.08       | 0.74       | 0.23       |
|        |        | C                     | <b>0.0</b> | 0.42       | 1.4        | 2.41       | 1.83       | <b>0.0</b> | <b>0.0</b> | 0.14       | <b>0.0</b> | 0.38       |
|        |        | G                     | 0.04       | <b>0.0</b> | 4.27       | <b>0.0</b> | 2.41       | 9.49       | 8.03       | 1.27       | 0.68       | 0.19       |
|        |        | T                     | 0.26       | 0.28       | <b>0.0</b> | 3.17       | 2.44       | 5.46       | 3.45       | <b>0.0</b> | 0.13       | <b>0.0</b> |
| CH     | SP4    | A                     | 0.73       | 0.03       | 3.14       | 1.54       | 3.87       | 7.87       | 5.63       | 0.47       | 1.68       | 0.51       |
|        |        | C                     | <b>0.0</b> | <b>0.0</b> | <b>0.0</b> | 3.37       | <b>0.0</b> | <b>0.0</b> | <b>0.0</b> | <b>0.0</b> | <b>0.0</b> | 0.46       |
|        |        | G                     | 1.21       | 3.06       | 3.97       | <b>0.0</b> | 4.7        | 4.47       | 6.34       | 3.48       | 1.68       | 1.1        |
|        |        | T                     | 0.61       | 3.1        | 3.38       | 1.44       | 3.94       | 5.67       | 1.64       | 1.56       | 0.75       | <b>0.0</b> |
| ETS    | ETV4   | A                     | <b>0.0</b> | 2.44       | 0.93       | 4.05       | 7.01       | 6.05       | 4.94       | 2.35       | 1.0        | 0.26       |
|        |        | C                     | 1.7        | <b>0.0</b> | 3.12       | 4.59       | <b>0.0</b> | <b>0.0</b> | 3.52       | 1.27       | 0.51       | <b>0.0</b> |
|        |        | G                     | 0.61       | 1.59       | 2.6        | 4.93       | 6.48       | 8.28       | <b>0.0</b> | <b>0.0</b> | 1.32       | 0.15       |
|        |        | T                     | 1.53       | 0.63       | <b>0.0</b> | <b>0.0</b> | 6.51       | 6.78       | 1.81       | 1.82       | <b>0.0</b> | 0.08       |
| GCM    | GCM1   | A                     | <b>0.0</b> | 4.76       | 5.27       | 1.8        | 1.76       | 5.92       | <b>0.0</b> | 2.42       | 0.2        | 0.07       |
|        |        | C                     | 1.62       | <b>0.0</b> | <b>0.0</b> | <b>0.0</b> | 1.18       | <b>0.0</b> | 2.82       | 1.13       | <b>0.0</b> | 0.11       |
|        |        | G                     | 0.3        | 7.43       | 5.86       | 2.94       | <b>0.0</b> | 1.5        | 2.38       | 1.24       | 0.07       | 0.22       |
|        |        | T                     | 1.51       | 6.11       | 7.64       | 2.5        | 1.45       | 0.69       | 2.37       | <b>0.0</b> | 0.41       | <b>0.0</b> |
| HMG    | LEF1   | A                     | 1.18       | 2.15       | 1.82       | 2.96       | 2.26       | 2.18       | <b>0.0</b> | 0.78       | 1.28       | 0.98       |
|        |        | C                     | <b>0.0</b> | <b>0.0</b> | 2.07       | 2.3        | 4.63       | 1.64       | 4.68       | 3.47       | <b>0.0</b> | 0.94       |
|        |        | G                     | 0.8        | 1.2        | 4.27       | 2.67       | 4.14       | <b>0.0</b> | 3.42       | 2.78       | 0.14       | 1.32       |
|        |        | T                     | 0.34       | 1.18       | <b>0.0</b> | <b>0.0</b> | <b>0.0</b> | 1.87       | 1.98       | <b>0.0</b> | 1.41       | <b>0.0</b> |

|           |        |   |            |            |            |            |            |            |            |            |            |            |
|-----------|--------|---|------------|------------|------------|------------|------------|------------|------------|------------|------------|------------|
| LIM-homeo | LHX3   | A | <b>0.0</b> | 0.02       | 0.96       | 2.96       | <b>0.0</b> | <b>0.0</b> | 3.23       | 1.24       | <b>0.0</b> | <b>0.0</b> |
|           |        | C | 0.55       | 0.47       | 0.27       | 0.97       | 1.66       | 3.8        | 3.95       | 1.02       | 1.97       | 0.39       |
|           |        | G | 0.55       | 0.32       | 0.72       | 4.54       | 2.45       | 3.97       | 4.27       | 2.22       | 1.53       | 0.17       |
|           |        | T | 0.21       | <b>0.0</b> | <b>0.0</b> | <b>0.0</b> | 3.64       | 4.07       | <b>0.0</b> | <b>0.0</b> | 0.86       | 0.15       |
| <hr/>     |        |   |            |            |            |            |            |            |            |            |            |            |
| POU       | HDX    | A | 0.05       | 0.13       | 0.12       | 0.11       | <b>0.0</b> | <b>0.0</b> | <b>0.0</b> | 1.03       | 0.82       | <b>0.0</b> |
|           |        | C | 0.08       | 0.12       | 0.09       | 0.79       | 0.15       | 2.16       | 6.98       | 3.09       | <b>0.0</b> | 1.61       |
|           |        | G | <b>0.0</b> | 0.02       | 0.16       | <b>0.0</b> | 0.28       | 0.24       | 1.07       | 1.19       | 0.71       | 0.85       |
|           |        | T | 0.08       | <b>0.0</b> | <b>0.0</b> | 0.82       | 0.72       | 0.67       | 1.56       | <b>0.0</b> | 1.08       | 0.77       |
| <hr/>     |        |   |            |            |            |            |            |            |            |            |            |            |
| SAND      | GMEB1  | A | 0.08       | 0.18       | 0.34       | 0.64       | <b>0.0</b> | 6.35       | 3.99       | 2.5        | 0.08       | <b>0.0</b> |
|           |        | C | 0.06       | 0.07       | 0.4        | 0.97       | 2.76       | <b>0.0</b> | 6.51       | 1.36       | <b>0.0</b> | 0.54       |
|           |        | G | <b>0.0</b> | 0.14       | <b>0.0</b> | 0.82       | 0.13       | 7.59       | <b>0.0</b> | 1.62       | 0.64       | 0.35       |
|           |        | T | 0.03       | <b>0.0</b> | 0.07       | <b>0.0</b> | 2.71       | 6.15       | 7.35       | <b>0.0</b> | 0.91       | 0.62       |
| <hr/>     |        |   |            |            |            |            |            |            |            |            |            |            |
| SMAD      | SMAD3  | A | <b>0.0</b> | 1.18       | 6.92       | 2.91       | 7.37       | 6.32       | 0.56       | 0.57       | <b>0.0</b> | 0.13       |
|           |        | C | 0.06       | 0.46       | 8.67       | 3.46       | <b>0.0</b> | 3.06       | 0.91       | 0.98       | 0.38       | 0.44       |
|           |        | G | 0.19       | 1.56       | <b>0.0</b> | 1.64       | 3.8        | 1.17       | <b>0.0</b> | <b>0.0</b> | 0.23       | 0.47       |
|           |        | T | 0.22       | <b>0.0</b> | 3.45       | <b>0.0</b> | 3.91       | <b>0.0</b> | 2.27       | 1.2        | 0.16       | <b>0.0</b> |
| <hr/>     |        |   |            |            |            |            |            |            |            |            |            |            |
| T-box     | EOMES  | A | 0.21       | 0.53       | 2.65       | 0.55       | <b>0.0</b> | 4.48       | <b>0.0</b> | 2.04       | 1.19       | 1.26       |
|           |        | C | 0.39       | 0.79       | 1.39       | <b>0.0</b> | 2.26       | <b>0.0</b> | 5.48       | <b>0.0</b> | <b>0.0</b> | 0.96       |
|           |        | G | 0.2        | 0.64       | 2.93       | 0.62       | 0.92       | 5.87       | 1.42       | 2.18       | 1.39       | 1.97       |
|           |        | T | <b>0.0</b> | <b>0.0</b> | <b>0.0</b> | 1.5        | 1.17       | 3.82       | 4.06       | 3.09       | 0.93       | <b>0.0</b> |
| <hr/>     |        |   |            |            |            |            |            |            |            |            |            |            |
| TATA      | TBP    | A | <b>0.0</b> | 2.79       | <b>0.0</b> | 0.39       | <b>0.0</b> | 0.13       | 0.01       | 0.08       | 0.14       | <b>0.0</b> |
|           |        | C | 1.94       | 1.86       | 2.05       | 1.55       | 1.23       | 0.93       | 0.55       | <b>0.0</b> | 0.06       | 0.02       |
|           |        | G | 2.24       | 4.92       | 4.17       | 3.77       | 1.11       | 1.01       | 0.49       | <b>0.0</b> | 0.15       | 0.14       |
|           |        | T | 0.3        | <b>0.0</b> | 0.79       | <b>0.0</b> | 0.85       | <b>0.0</b> | <b>0.0</b> | 0.08       | <b>0.0</b> | 0.01       |
| <hr/>     |        |   |            |            |            |            |            |            |            |            |            |            |
| bHLH      | BHLHB2 | A | <b>0.0</b> | <b>0.0</b> | 1.34       | <b>0.0</b> | 4.87       | 2.92       | 2.45       | 7.16       | <b>0.0</b> | 1.08       |
|           |        | C | 0.24       | 0.85       | <b>0.0</b> | 2.12       | <b>0.0</b> | 3.33       | 2.73       | 5.81       | 0.43       | <b>0.0</b> |
|           |        | G | 0.02       | 0.23       | 3.19       | 1.54       | 3.31       | <b>0.0</b> | 2.69       | <b>0.0</b> | 2.27       | 0.47       |
|           |        | T | 0.14       | 0.2        | 3.23       | 1.91       | 2.43       | 5.03       | <b>0.0</b> | 8.16       | 2.17       | 0.61       |
| <hr/>     |        |   |            |            |            |            |            |            |            |            |            |            |
| bHLH-ZIP  | MAX    | A | <b>0.0</b> | 0.35       | 1.42       | <b>0.0</b> | 4.42       | 0.61       | 2.29       | 6.58       | 0.6        | 0.15       |
|           |        | C | 0.39       | <b>0.0</b> | <b>0.0</b> | 2.47       | <b>0.0</b> | 2.92       | 6.73       | 9.44       | 0.36       | 0.26       |
|           |        | G | 0.24       | 0.27       | 2.54       | 0.88       | 2.83       | <b>0.0</b> | 4.18       | <b>0.0</b> | <b>0.0</b> | 0.23       |
|           |        | T | 0.42       | 0.19       | 2.74       | 1.69       | 2.44       | 5.64       | <b>0.0</b> | 3.66       | 0.41       | <b>0.0</b> |

|       |         |   |            |            |            |            |            |            |            |            |            |            |
|-------|---------|---|------------|------------|------------|------------|------------|------------|------------|------------|------------|------------|
| bHSH  | TCFAP2B | A | 0.64       | 2.13       | 8.21       | 7.29       | 2.39       | 1.23       | <b>0.0</b> | 1.27       | 5.18       | 2.0        |
|       |         | C | <b>0.0</b> | 1.63       | <b>0.0</b> | <b>0.0</b> | 0.1        | <b>0.0</b> | 0.71       | 5.73       | 7.78       | 0.59       |
|       |         | G | 1.4        | <b>0.0</b> | 8.13       | 9.55       | 0.78       | 0.13       | 0.64       | <b>0.0</b> | <b>0.0</b> | <b>0.0</b> |
|       |         | T | 0.12       | 6.51       | 7.14       | 2.59       | <b>0.0</b> | 0.77       | 2.1        | 7.23       | 7.65       | 2.12       |
| <hr/> |         |   |            |            |            |            |            |            |            |            |            |            |
| bZIP  | ATF1    | A | <b>0.0</b> | 2.87       | 2.46       | <b>0.0</b> | 2.51       | 1.34       | 0.82       | <b>0.0</b> | <b>0.0</b> | 0.19       |
|       |         | C | 0.87       | 4.35       | 3.48       | 6.7        | <b>0.0</b> | 3.21       | 0.75       | 0.12       | 0.62       | 0.21       |
|       |         | G | 0.13       | 6.18       | <b>0.0</b> | 3.33       | 2.52       | <b>0.0</b> | 1.36       | 0.3        | 0.23       | 0.17       |
|       |         | T | 1.2        | <b>0.0</b> | 1.07       | 1.92       | 1.1        | 1.84       | <b>0.0</b> | 0.51       | 0.37       | <b>0.0</b> |
| <hr/> |         |   |            |            |            |            |            |            |            |            |            |            |
| Fork  | E2F     | A | <b>0.0</b> | 0.41       | 2.88       | 3.38       | 3.52       | 7.07       | 1.03       | <b>0.0</b> | <b>0.0</b> | <b>0.0</b> |
|       |         | C | 0.43       | <b>0.0</b> | 0.61       | <b>0.0</b> | 6.29       | <b>0.0</b> | <b>0.0</b> | 0.28       | 0.72       | 0.42       |
|       |         | G | 0.12       | 0.12       | <b>0.0</b> | 8.01       | <b>0.0</b> | 1.89       | 0.72       | 0.76       | 0.87       | 0.56       |
|       |         | T | 0.25       | 0.8        | 3.38       | 6.51       | 1.8        | 2.75       | 1.02       | 0.38       | 0.09       | 0.15       |
| <hr/> |         |   |            |            |            |            |            |            |            |            |            |            |
| Homeo | EMX2    | A | <b>0.0</b> | 0.12       | 0.37       | 0.95       | <b>0.0</b> | <b>0.0</b> | 2.38       | 5.49       | <b>0.0</b> | 0.31       |
|       |         | C | 0.1        | 0.27       | <b>0.0</b> | 0.33       | 0.35       | 1.88       | 3.84       | 2.3        | 4.96       | 0.65       |
|       |         | G | 0.02       | <b>0.0</b> | 0.07       | 1.35       | 1.14       | 2.61       | 4.1        | 1.96       | 2.98       | <b>0.0</b> |
|       |         | T | 0.23       | 0.49       | 0.27       | <b>0.0</b> | 0.74       | 1.72       | <b>0.0</b> | <b>0.0</b> | 1.93       | 0.68       |
| <hr/> |         |   |            |            |            |            |            |            |            |            |            |            |
| TRP   | RAP1    | A | 6.92       | 6.41       | 5.74       | <b>0.0</b> | 4.27       | <b>0.0</b> | 5.28       | <b>0.0</b> | 6.36       | 4.9        |
|       |         | C | <b>0.0</b> | <b>0.0</b> | <b>0.0</b> | 5.24       | 7.2        | 6.47       | <b>0.0</b> | 5.51       | <b>0.0</b> | <b>0.0</b> |
|       |         | G | 6.78       | 6.74       | 5.64       | 2.62       | 1.86       | 5.66       | 7.25       | 7.18       | 7.2        | 4.67       |
|       |         | T | 3.95       | 7.06       | 4.95       | 5.66       | <b>0.0</b> | 7.46       | 7.46       | 6.43       | 2.53       | 5.23       |
